# Supplementary material for: Assessing the causal relationship between CRP,IL-1α, IL-1β, and IL-6 levels and intervertebral discdegeneration: a two-sample Mendelianrandomization study
Source: Research Square preprint supplement (doi:10.21203/rs.3.rs-4232113/v1), 2024-04-22
Supplement: Supplementary file 1 [file 427521e6f228be50f473a6da.xlsx]

## Sheet: INDEX
	Table of Contents
	Supp Table #	Contents of Supplementary Tables
	Table 1.	GWAS data sources of exposure used in the present study.		0
	Table 2.	GWAS data source of outcome used in the present study.
	Table 3.	Details information of selected SNPs.
	Table 4.	Phenotype information of selected SNPs.
	Supplementary Figs-S1–S2.	Scatter plot and Funnel plot for MR analysis of the causal effect of CRP on IVDD.

## Sheet: SupTable 1. GWAS exposure 
Supplementary Table 1. GWAS data sources of exposure used in the present study
Phenotype	Consortium	GWAS ID	Sample Size	PMID	Year	Population	Number of SNPs	Units
C-reactive protein	A GWAS meta-analysis	ieu-b-35	204402	30388399	2018	European	2414379	mg/L
IL-6	A GWAS meta-analysis	NA	67428	33517400	2021	European	2454025	pg/ml
IL-1α	NA	prot-c-4851_25_1	997	28240269	2019	European	501428	NA
IL-1β	NA	prot-a-1495	3301	29875488	2018	European	10534735	NA

## Sheet: SupTable 2. GWAS outcome
Supplementary Table 2. GWAS data source of outcome used in the present study
Outcome	Consortium	ID	Cases	Control	Population	Definition/inclusion criteria	Adjustments
IVDD	Finngen (R7)	M13_INTERVERTEB	29508	227388	European	ICD-10M51, ICD-9 722, ICD-8 725; excluded ICD-9 7220|7224|7227|7228Av, ICD-87250	sex, age, 10 PCs, genotyping batch

## Sheet: SupTable 3. Details of SNPs
Supplementary Table 3. Characteristics for the selected SNPs of IL-6-IVDD
SNP	effect_allele.exposure	other_allele.exposure	effect_allele.outcome	other_allele.outcome	beta.exposure	beta.outcome	eaf.exposure	eaf.outcome	remove	palindromic	ambiguous	id.outcome	pos.outcome	pval.outcome	se.outcome	outcome	mr_keep.outcome	pval_origin.outcome	chr.exposure	pos.exposure	se.exposure	pval.exposure	samplesize.exposure	exposure	mr_keep.exposure	pval_origin.exposure	id.exposure	data_source.exposure	F	mr_keep
rs4537545	T	C	T	C	0.090997	0.00818347	0.39366	0.311312	FALSE	FALSE	FALSE	IVDD	154446403	0.395827	0.00963784	outcome	TRUE	reported	1	152685503	0.004563	8.39e-85	51876	IL-6	TRUE	reported	NA	textfile	397.698	TRUE
rs660895	G	A	G	A	0.035794	-0.011379	0.186447	0.247714	FALSE	FALSE	FALSE	IVDD	32609603	0.267766	0.0102678	outcome	TRUE	reported	6	32685358	0.005821	1.8e-09	46600	IL-6	TRUE	reported	NA	textfile	37.8116	TRUE
Supplementary Table 3. Characteristics for the selected SNPs of IL-1α-IVDD
SNP	effect_allele.exposure	other_allele.exposure	effect_allele.outcome	other_allele.outcome	beta.exposure	beta.outcome	eaf.exposure	eaf.outcome	remove	palindromic	ambiguous	id.outcome	pos.outcome	pval.outcome	se.outcome	outcome	mr_keep.outcome	pval_origin.outcome	samplesize.exposure	chr.exposure	pval.exposure	se.exposure	pos.exposure	id.exposure	exposure	mr_keep.exposure	pval_origin.exposure	data_source.exposure	F	mr_keep
rs1926447	G	A	G	A	0.2765	-0.0131503	NA	0.80491	FALSE	FALSE	FALSE	IVDD	46055809	0.241368	0.0112245	outcome	TRUE	reported	989	13	2.77799e-08	0.049375	46629944	prot-c-4851_25_1	IL-1alpha	TRUE	reported	textfile	31.36	TRUE
Supplementary Table 3. Characteristics for the selected SNPs of IL-1β-IVDD
SNP	effect_allele.exposure	other_allele.exposure	effect_allele.outcome	other_allele.outcome	beta.exposure	beta.outcome	eaf.exposure	eaf.outcome	remove	palindromic	ambiguous	id.outcome	pos.outcome	pval.outcome	se.outcome	outcome	mr_keep.outcome	pval_origin.outcome	pos.exposure	chr.exposure	se.exposure	pval.exposure	samplesize.exposure	id.exposure	exposure	mr_keep.exposure	pval_origin.exposure	data_source.exposure	F	mr_keep
rs967645	T	C	T	C	-0.1427	0.0192758	0.50945	0.444787	FALSE	FALSE	FALSE	NA	28386951	0.0308966	0.0089306	IVDD	TRUE	reported	26713970	17	0.0244	5.12861e-09	3301	prot-a-1495	IL-1beta	TRUE	reported	textfile	34.2033	TRUE
Supplementary Table 3. Characteristics for the selected SNPs of CRP-IVDD
SNP	effect_allele.exposure	other_allele.exposure	effect_allele.outcome	other_allele.outcome	beta.exposure	beta.outcome	eaf.exposure	eaf.outcome	remove	palindromic	ambiguous	id.outcome	pos.outcome	pval.outcome	se.outcome	outcome	mr_keep.outcome	pval_origin.outcome	chr.exposure	pos.exposure	se.exposure	pval.exposure	samplesize.exposure	id.exposure	exposure	mr_keep.exposure	pval_origin.exposure	data_source.exposure	F	mr_keep
rs10512597	C	T	C	T	0.036931	0.000266901	0.817288	0.768601	FALSE	FALSE	FALSE	NULL	74703694	0.977263	0.00936497	IVDD	TRUE	reported	17	72699833	0.00489	4.44017e-14	204402	ieu-b-35	CRP	TRUE	reported	textfile	57.038	TRUE
rs1051338	G	T	G	T	0.023881	-0.014875	0.308119	0.353497	FALSE	FALSE	FALSE	NULL	89247603	0.0728652	0.00829302	IVDD	TRUE	reported	10	91007360	0.003992	2.27002e-09	204402	ieu-b-35	CRP	TRUE	reported	textfile	35.7869	TRUE
rs10832027	A	G	A	G	0.025944	0.0331323	0.668809	0.539118	FALSE	FALSE	FALSE	NULL	13335636	2.94368e-05	0.0079306	IVDD	TRUE	reported	11	13357183	0.003745	4.42996e-12	204402	ieu-b-35	CRP	TRUE	reported	textfile	47.9922	TRUE
rs10925027	C	T	C	T	-0.036035	0.00763089	0.599644	0.611392	FALSE	FALSE	FALSE	NULL	247449260	0.347707	0.00812621	IVDD	TRUE	reported	1	247612562	0.00382	4.25011e-21	204402	ieu-b-35	CRP	TRUE	reported	textfile	88.9861	TRUE
rs12117074	A	G	A	G	0.104477	0.0283358	0.02612	0.0229511	FALSE	FALSE	FALSE	NULL	159568716	0.278791	0.0261632	IVDD	TRUE	reported	1	159538506	0.011968	2.71019e-18	204402	ieu-b-35	CRP	TRUE	reported	textfile	76.2076	TRUE
rs12202641	T	C	T	C	-0.022804	-0.00642171	0.39442	0.393459	FALSE	FALSE	FALSE	NULL	115993471	0.426368	0.00807336	IVDD	TRUE	reported	6	116314634	0.003617	2.99999e-10	204402	ieu-b-35	CRP	TRUE	reported	textfile	39.7489	TRUE
rs12587622	A	G	A	G	-0.020798	-0.00948778	0.500861	0.504064	FALSE	FALSE	FALSE	NULL	72898466	0.230699	0.00791597	IVDD	TRUE	reported	14	73365174	0.003609	8.52001e-09	204402	ieu-b-35	CRP	TRUE	reported	textfile	33.21	TRUE
rs1260326	C	T	C	T	-0.073462	-0.00617279	0.607156	0.651003	FALSE	FALSE	FALSE	NULL	27508073	0.457111	0.00830108	IVDD	TRUE	reported	2	27730940	0.003604	2.72019e-92	204402	ieu-b-35	CRP	TRUE	reported	textfile	415.486	TRUE
rs12960928	C	T	C	T	0.024	-0.00958794	0.267003	0.196133	FALSE	FALSE	FALSE	NULL	60230570	0.336333	0.00997251	IVDD	TRUE	reported	18	57897803	0.003993	1.90999e-09	204402	ieu-b-35	CRP	TRUE	reported	textfile	36.1263	TRUE
rs12995480	C	T	C	T	0.031261	-0.0198041	0.830925	0.83673	FALSE	FALSE	FALSE	NULL	629881	0.0661607	0.0107787	IVDD	TRUE	reported	2	629881	0.004855	1.24e-10	204402	ieu-b-35	CRP	TRUE	reported	textfile	41.4598	TRUE
rs13233571	T	C	T	C	-0.056895	-0.00293744	0.119609	0.127247	FALSE	FALSE	FALSE	NULL	73556901	0.804722	0.0118809	IVDD	TRUE	reported	7	72971231	0.005476	2.94985e-25	204402	ieu-b-35	CRP	TRUE	reported	textfile	107.95	TRUE
rs13409371	A	G	A	G	0.048232	0.0223057	0.429854	0.296208	FALSE	FALSE	FALSE	NULL	113080568	0.0100432	0.00866462	IVDD	TRUE	reported	2	113838145	0.003847	5.06991e-36	204402	ieu-b-35	CRP	TRUE	reported	textfile	157.19	TRUE
rs1441169	G	A	G	A	-0.024926	0.00091364	0.532568	0.58558	FALSE	FALSE	FALSE	NULL	213168806	0.909518	0.00803932	IVDD	TRUE	reported	2	214033530	0.003725	2.26986e-11	204402	ieu-b-35	CRP	TRUE	reported	textfile	44.7768	TRUE
rs1490384	T	C	T	C	-0.024816	-0.0174056	0.512283	0.478695	FALSE	FALSE	FALSE	NULL	126530014	0.0274688	0.00789441	IVDD	TRUE	reported	6	126851160	0.003545	2.64972e-12	204402	ieu-b-35	CRP	TRUE	reported	textfile	49.0039	TRUE
rs1509394	T	C	T	C	0.025685	0.0174019	0.542959	0.538779	FALSE	FALSE	FALSE	NULL	28424217	0.0283812	0.00793889	IVDD	TRUE	reported	2	28647084	0.004147	6.05006e-10	204402	ieu-b-35	CRP	TRUE	reported	textfile	38.3611	TRUE
rs1582763	A	G	A	G	-0.022107	0.00619464	0.37181	0.282375	FALSE	FALSE	FALSE	NULL	60254475	0.484731	0.00886577	IVDD	TRUE	reported	11	60021948	0.0037	2.37001e-09	204402	ieu-b-35	CRP	TRUE	reported	textfile	35.699	TRUE
rs17658229	C	T	C	T	0.055568	0.00855626	0.045881	0.048558	FALSE	FALSE	FALSE	NULL	172764049	0.641472	0.0183752	IVDD	TRUE	reported	5	172191052	0.009522	5.49997e-09	204402	ieu-b-35	CRP	TRUE	reported	textfile	34.056	TRUE
rs178810	T	C	T	C	0.02001	0.00527335	0.562924	0.606082	FALSE	FALSE	FALSE	NULL	16194116	0.514938	0.0080983	IVDD	TRUE	reported	17	16097430	0.003606	2.94999e-08	204402	ieu-b-35	CRP	TRUE	reported	textfile	30.7923	TRUE
rs1800961	T	C	T	C	-0.1115	-0.00179483	0.033816	0.0454415	FALSE	FALSE	FALSE	NULL	44413724	0.924826	0.0190218	IVDD	TRUE	reported	20	43042364	0.011267	4.6302e-23	204402	ieu-b-35	CRP	TRUE	reported	textfile	97.9339	TRUE
rs1805096	A	G	A	G	-0.104381	0.0122959	0.38625	0.468021	FALSE	FALSE	FALSE	NULL	65636574	0.121179	0.00793363	IVDD	TRUE	reported	1	66102257	0.003614	2.1677e-183	204402	ieu-b-35	CRP	TRUE	reported	textfile	834.193	TRUE
rs2064009	T	C	T	C	0.027111	0.00808289	0.581445	0.526543	FALSE	FALSE	FALSE	NULL	115995625	0.307388	0.00791882	IVDD	TRUE	reported	8	117007850	0.003549	2.27982e-14	204402	ieu-b-35	CRP	TRUE	reported	textfile	58.3551	TRUE
rs2239222	G	A	G	A	0.035484	0.0043502	0.363541	0.375387	FALSE	FALSE	FALSE	NULL	72545177	0.597398	0.00823674	IVDD	TRUE	reported	14	73011885	0.003901	9.86961e-20	204402	ieu-b-35	CRP	TRUE	reported	textfile	82.7396	TRUE
rs2315008	G	T	G	T	0.023467	0.0253386	0.687731	0.739696	FALSE	FALSE	FALSE	NULL	63712604	0.0051114	0.00904976	IVDD	TRUE	reported	20	62343956	0.003777	5.36006e-10	204402	ieu-b-35	CRP	TRUE	reported	textfile	38.603	TRUE
rs2352975	C	T	C	T	0.024897	0.0103109	0.303573	0.253719	FALSE	FALSE	FALSE	NULL	49854452	0.256973	0.00909593	IVDD	TRUE	reported	3	49891885	0.004026	6.42999e-10	204402	ieu-b-35	CRP	TRUE	reported	textfile	38.2425	TRUE
rs2650000	C	A	C	A	0.11806	-0.0199364	0.647809	0.587234	FALSE	FALSE	FALSE	NULL	120951159	0.0135126	0.00807155	IVDD	TRUE	reported	12	121388962	0.003673	1e-200	204402	ieu-b-35	CRP	TRUE	reported	textfile	1033.15	TRUE
rs2710804	C	T	C	T	0.021262	0.000224628	0.367409	0.354238	FALSE	FALSE	FALSE	NULL	36044919	0.978266	0.00824552	IVDD	TRUE	reported	7	36084529	0.003737	1.29999e-08	204402	ieu-b-35	CRP	TRUE	reported	textfile	32.3714	TRUE
rs2836878	A	G	A	G	-0.042902	-0.00783596	0.27418	0.247836	FALSE	FALSE	FALSE	NULL	39093608	0.393137	0.00917622	IVDD	TRUE	reported	21	40465534	0.004079	7.71081e-26	204402	ieu-b-35	CRP	TRUE	reported	textfile	110.624	TRUE
rs2852151	A	G	A	G	0.024735	0.00198319	0.404527	0.438755	FALSE	FALSE	FALSE	NULL	12841177	0.803794	0.00798261	IVDD	TRUE	reported	18	12841176	0.003655	1.35988e-11	204402	ieu-b-35	CRP	TRUE	reported	textfile	45.7983	TRUE
rs2891677	T	C	T	C	0.019859	-0.00251377	0.538958	0.539034	FALSE	FALSE	FALSE	NULL	125331966	0.750979	0.00792115	IVDD	TRUE	reported	8	126344208	0.003511	1.59001e-08	204402	ieu-b-35	CRP	TRUE	reported	textfile	31.9929	TRUE
rs3134899	T	C	T	C	0.023329	0.0221289	0.767055	0.687445	FALSE	FALSE	FALSE	NULL	31505509	0.00938253	0.00851836	IVDD	TRUE	reported	6	31473286	0.004274	4.93003e-08	204402	ieu-b-35	CRP	TRUE	reported	textfile	29.7936	TRUE
rs340005	A	G	A	G	0.030007	-0.0184701	0.620695	0.721663	FALSE	FALSE	FALSE	NULL	60585831	0.0364016	0.00882718	IVDD	TRUE	reported	15	60878030	0.003736	1.00995e-15	204402	ieu-b-35	CRP	TRUE	reported	textfile	64.5107	TRUE
rs4092465	G	A	G	A	0.027483	0.00697335	0.650698	0.623731	FALSE	FALSE	FALSE	NULL	57413205	0.394416	0.00818818	IVDD	TRUE	reported	18	55080437	0.004364	3.11e-10	204402	ieu-b-35	CRP	TRUE	reported	textfile	39.6606	TRUE
rs4246598	A	C	A	C	0.022063	-0.0056427	0.46258	0.622395	FALSE	FALSE	FALSE	NULL	88138531	0.490331	0.00818039	IVDD	TRUE	reported	2	88438050	0.003547	5.10999e-10	204402	ieu-b-35	CRP	TRUE	reported	textfile	38.6907	TRUE
rs4655802	A	G	A	G	-0.025012	-0.00321446	0.614793	0.593181	FALSE	FALSE	FALSE	NULL	65422548	0.691974	0.00811368	IVDD	TRUE	reported	1	65888231	0.00416	1.88001e-09	204402	ieu-b-35	CRP	TRUE	reported	textfile	36.1502	TRUE
rs469772	T	C	T	C	-0.031327	0.012995	0.193541	0.212414	FALSE	FALSE	FALSE	NULL	91064748	0.178555	0.00966018	IVDD	TRUE	reported	1	91530305	0.004542	5.53988e-12	204402	ieu-b-35	CRP	TRUE	reported	textfile	47.5711	TRUE
rs4803750	G	A	G	A	0.057878	0.0113204	0.063325	0.0631891	FALSE	FALSE	FALSE	NULL	44744370	0.49056	0.0164202	IVDD	TRUE	reported	19	45247627	0.008116	1.03992e-12	204402	ieu-b-35	CRP	TRUE	reported	textfile	50.8561	TRUE
rs4841132	G	A	G	A	0.065095	0.00210041	0.909023	0.856992	FALSE	FALSE	FALSE	NULL	9326086	0.851754	0.0112393	IVDD	TRUE	reported	8	9183596	0.006243	1.99986e-25	204402	ieu-b-35	CRP	TRUE	reported	textfile	108.72	TRUE
rs4845625	C	T	C	T	-0.055975	0.00867741	0.571169	0.480629	FALSE	FALSE	FALSE	NULL	154449591	0.274046	0.00793333	IVDD	TRUE	reported	1	154422067	0.00362	6.87068e-54	204402	ieu-b-35	CRP	TRUE	reported	textfile	239.095	TRUE
rs6001193	G	A	G	A	-0.027809	-0.010178	0.35065	0.358274	FALSE	FALSE	FALSE	NULL	38678732	0.21701	0.00824448	IVDD	TRUE	reported	22	39074737	0.003706	6.5298e-14	204402	ieu-b-35	CRP	TRUE	reported	textfile	56.3067	TRUE
rs6601302	G	T	G	T	-0.030518	-0.017336	0.736931	0.733349	FALSE	FALSE	FALSE	NULL	9381948	0.0538617	0.00899197	IVDD	TRUE	reported	8	9239458	0.004478	9.79941e-12	204402	ieu-b-35	CRP	TRUE	reported	textfile	46.4455	TRUE
rs6857	T	C	T	C	-0.19903	-0.0229726	0.15173	0.196668	FALSE	FALSE	FALSE	NULL	44888997	0.0224673	0.0100652	IVDD	TRUE	reported	19	45392254	0.005641	1e-200	204402	ieu-b-35	CRP	TRUE	reported	textfile	1244.87	TRUE
rs7298368	T	C	T	C	-0.026374	0.00291868	0.16955	0.223043	FALSE	FALSE	FALSE	NULL	121221881	0.758069	0.00947569	IVDD	TRUE	reported	12	121659684	0.004802	4.05005e-08	204402	ieu-b-35	CRP	TRUE	reported	textfile	30.1653	TRUE
rs733228	C	T	C	T	0.027671	-0.019335	0.211226	0.17674	FALSE	FALSE	FALSE	NULL	154667142	0.0612224	0.0103291	IVDD	TRUE	reported	1	154639618	0.004429	4.27996e-10	204402	ieu-b-35	CRP	TRUE	reported	textfile	39.0336	TRUE
rs9271608	G	A	G	A	0.042021	-0.0175513	0.215335	0.151327	FALSE	FALSE	FALSE	NULL	32623811	0.112493	0.0110588	IVDD	TRUE	reported	6	32591588	0.004954	2.33024e-17	204402	ieu-b-35	CRP	TRUE	reported	textfile	71.9483	TRUE
rs9284725	A	C	A	C	-0.02731	-0.00995237	0.761212	0.872323	FALSE	FALSE	FALSE	NULL	102128394	0.40389	0.0119234	IVDD	TRUE	reported	2	102744854	0.00419	7.34007e-11	204402	ieu-b-35	CRP	TRUE	reported	textfile	42.483	TRUE

## Sheet: SupTable 4.  Phenotype of SNPs
Supplementary Table 4. Phenotype information of selected IL-6-IVDD SNPs
SNP	Traits
rs4537545	interleukin-6 measurement， C-reactive protein measurement
rs660895	rheumatoid arthritis，interleukin-6 measurement
Supplementary Table 4. Phenotype information of selected IL-1-α SNPs
SNP	Traits
rs1926447	protein measurement，blood protein measurement
Supplementary Table 4. Phenotype information of selected IL-1-β SNPs
SNP	Traits
rs967645	blood protein measurement
Supplementary Table 4. Phenotype information of selected CRP-IVDD SNPs
SNP	Traits
rs10512597	Fibrinogen，Fibrinogen levels，Red cell distribution width，C-reactive protein levels
rs1051338	blood protein measurement,coronary artery disease,C-reactive protein measurement
rs10521222	C-reactive protein measurement,serum gamma-glutamyl transferase measurement,body height
rs10832027	triglyceride measurement, C-reactive protein measurement,total cholesterol measurement, triglyceride measurement, low density lipoprotein cholesterol measurement, high density lipoprotein cholesterol measurement,psoriasis
rs10925027	None
rs12117074	None
rs12202641	C-reactive protein measurement
rs12587622	None
rs1260326	glomerular filtration rate,metabolic syndrome,sodium measurement,apolipoprotein A 1 measurement,low density lipoprotein cholesterol measurement
rs12960928	C-reactive protein measurement
rs12995480	C-reactive protein measurement
rs13233571	C-reactive protein measurement,high density lipoprotein cholesterol measurement,alcohol consumption measurement
rs13409371	C-reactive protein measurement
rs1441169	C-reactive protein measurement
rs1490384	body height,brain volume measurement,C-reactive protein measurement
rs1509394	None
rs1582763	soluble triggering receptor expressed on myeloid cells 2 measurement,family history of Alzheimer’s disease,Alzheimer disease,blood protein measurement,late-onset Alzheimers disease
rs17658229	optic disc size measurement,C-reactive protein measurement
rs178810	C-reactive protein measurement
rs1800961	metabolic syndrome,low density lipoprotein cholesterol measurement, alcohol consumption measurement,low density lipoprotein cholesterol measurement, alcohol drinking,high density lipoprotein cholesterol measurement
rs1805096	C-reactive protein measurement
rs2064009	C-reactive protein measurement
rs2239222	C-reactive protein measurement,alkaline phosphatase measurement,C-reactive protein measurement,sex hormone-binding globulin measurement
rs2315008	inflammatory bowel disease,neutrophil count,vital capacity
rs2352975	C-reactive protein measurement
rs2650000	low density lipoprotein cholesterol measurement，inflammatory response，serum gamma-glutamyl transferase measurement，C-reactive protein measurement，Insulinogenic index measurement
rs2710804	fibrinogen measurement,lymphocyte count,serum alanine aminotransferase measurement
rs2836878	ulcerative colitis,C-reactive protein measurement,inflammatory bowel disease,Crohn's disease
rs2852151	C-reactive protein measurement
rs2891677	C-reactive protein measurement
rs3134899	None
rs340005	serum gamma-glutamyl transferase measurement,C-reactive protein measurement,low density lipoprotein cholesterol measurement
rs4092465	alkaline phosphatase measurement,sex hormone-binding globulin measurement
rs4246598	C-reactive protein measurement,total cholesterol measurement,low density lipoprotein cholesterol measurement
rs4655802	C-reactive protein measurement
rs469772	total cholesterol measurement, C-reactive protein measurement, C-reactive protein measurement
rs4803750	Alzheimer disease, fasting blood insulin measurement,high density lipoprotein cholesterol measurement,low density lipoprotein cholesterol measurement
rs4841132	low density lipoprotein cholesterol measurement, alcohol drinking,triglyceride measurement, alcohol consumption measurement
rs4845625	coronary artery disease
rs6001193	C-reactive protein measurement
rs6601302	None
rs6857	visceral adipose tissue measurement,sleep duration, low density lipoprotein cholesterol measurement,age-related macular degeneration
rs7298368	None
rs733228	None
rs9271608	C-reactive protein measurement
rs9284725	C-reactive protein measurement

## Sheet: Supplementary Figs-S1–S2
Supplementary Figs-S1–S2: Scatter plot and Funnel plot for MR analysis of the causal effect of CRP on IVDD
S1: Scatter for MR analysis of the causal effect of CRP on IVDD	S2: Forest plot of the causal effects of CRP on IVDD.
