# Supplementary material for: Assessing the causal relationship between CRP,IL-1α, IL-1β, and IL-6 levels and intervertebral discdegeneration: a two-sample Mendelianrandomization study
Source: Research Square preprint supplement (doi:10.21203/rs.3.rs-4232113/v1), 2024-04-22
Supplement: Supplementary file 2 [file c5c7f375bd3c47d07d87ce8c.docx]

**STROBE-MR checklist of recommended items to address in reports of Mendelian randomization studies**12

| **Item No.** | **Section** | **Checklist item** | **Page No.** | **Relevant text from manuscript** |
| --- | --- | --- | --- | --- |
| 1 | **TITLE and ABSTRACT** | Indicate Mendelian randomization (MR) as the study’s design in the title and/or the abstract if that is a main purpose of the study | 1 | In“**Title**”: “Assessing the causal relationship between CRP,IL-1α, IL-1β, and IL-6 levels and intervertebral disc degeneration: a two-sample Mendelian randomization study ” and in“**Abstract**”: “……This study adopted two-sample Mendelian randomization (MR) approach to explore the etiological role of chronic inflammation in IVDD risk…….” |
|  | **INTRODUCTION** |  | 1-2 |  |
| 2 | **Background** | Explain the scientific background and rationale for the reported study. What is the exposure? Is a potential causal relationship between exposure and outcome plausible? Justify why MR is a helpful method to address the study question | 1-2 | “Relevant research has proven that excessive inflammatory response, exacerbated aging, apoptosis of the intervertebral disc (IVD) cells, and degradation of the extracellular matrix are considered key pathological features of IVDD. In recent years, an increasing amount of evidence has shown that chronic inflammation is closely related to the progression of IVDD. ……  Various inflammatory factors (e.g. interleukin (IL)-6, IL-1α , IL-1β, C-reactive protein (CRP)) are significantly increased in degenerated intervertebral discs……. CRP is a serum marker of chronic inflammation, produced in the liver under the stimulation of IL-1 and IL-6. IL-1 and IL-6, as upstream stimulating factors of CRP, play a key role in the occurrence of IVDD. ……Recent findings from in vitro experiments and clinical observational trials have begun to reveal the role of chronic inflammation in IVDD, but there is still a lack of related randomized controlled studies. It is not currently clear whether chronic inflammation is a result or cause of IVDD, and observational studies cannot rule out the effects of reverse causality and confounding factors. Therefore, it is necessary to introduce some stronger alternative methods, such as Mendelian randomization (MR). Mendelian randomization solves these problems by using genetic variations as instrumental variables for testing exposures. The allele of genetic variation related to exposure is randomly assigned and is not affected by reverse causality.  ” |
| 3 | **Objectives** | State specific objectives clearly, including pre-specified causal hypotheses (if any). State that MR is a method that, under specific assumptions, intends to estimate causal effects | 2 | “Therefore, this study uses the two-sample MR (TSMR) analysis method to explore the causal relationship between IL-6, IL-1α, IL-1β, CRP, and IVDD.” |
|  | **METHODS** |  | 2-3 |  |
| 4 | **Study design and data sources** | Present key elements of the study design early in the article. Consider including a table listing sources of data for all phases of the study. For each data source contributing to the analysis, describe the following: |  |  |
|  | a) | Setting: Describe the study design and the underlying population, if possible. Describe the setting, locations, and relevant dates, including periods of recruitment, exposure, follow-up, and data collection, when available. | 2＆7 | In“**study design**”: “In this study, we conducted TSMR analysis to investigate potential causal associations between various inflammatory factors (i.e. CRP, IL-1 α , IL-1 β and IL-6) and IVDD. ……The schematic outline of this study is shown in Figure 1.” |
|  | b) | Participants: Give the eligibility criteria, and the sources and methods of selection of participants. Report the sample size, and whether any power or sample size calculations were carried out prior to the main analysis | 2 | In “**Data sources**”: “Summary data for CRP, IL-1α, and IL-1β-related single nucleotide polymorphisms (SNPs) were download from the genome-wide association study (GWAS) summary data (https://gwas.mrcieu.ac.uk/). The variants associated with CRP were obtained from a GWAS of up to 204,402 individuals of European ancestry. Genetic variants for IL-1α were collected from a GWAS of European individuals. The IL-1β-related SNPs were studied from the INTERVAL study, including 3,301 normal subjects. Variants associated with IL-6 were obtained from a GWAS of up to 67,428 individuals of European ancestry. The details of these GWAS data sources are listed in Supplementary Table 1. The summary results for Intervertebral Disc Degeneration (IVDD) were acquired from the FinnGen consortium, including 29,508 cases and 227,388 controls. Other detailed information of the outcome is presented in Supplementary Table 2.” |
|  | c) | Describe measurement, quality control and selection of genetic variants | 2 | In “Selection of genetic instruments”, please refer to Selection of genetic instruments for details. |
|  | d) | For each exposure, outcome, and other relevant variables, describe methods of assessment and diagnostic criteria for diseases | 2 | In **“Data source**”:“The diagnosis of IVDD was based on ICD-10 code M51, ICD-9 code 722 and ICD-8 code 275.” |
|  | e) | Provide details of ethics committee approval and participant informed consent, if relevant | NA |  |
| 5 | **Assumptions** | Explicitly state the three core IV assumptions for the main analysis (relevance, independence and exclusion restriction) as well assumptions for any additional or sensitivity analysis | 2 | In “**Study design**”: The research of this study was built upon three assumptions: (1) The instrumental variables (IVs) should be robustly associated with exposure; (2) The IVs should not be associated with potential confounders; and (3) the IVs should not have direct association with the outcomes of interest but affect the outcome exclusively through the exposure not via other biological pathways. |
| 6 | **Statistical methods: main analysis** | Describe statistical methods and statistics used | 2-3 |  |
|  | a) | Describe how quantitative variables were handled in the analyses (i.e., scale, units, model) | NA |  |
|  | b) | Describe how genetic variants were handled in the analyses and, if applicable, how their weights were selected | 2 | In “**Selection of genetic instruments**”, please refer to Selection of genetic instruments for details. |
|  | c) | Describe the MR estimator (e.g. two-stage least squares, Wald ratio) and related statistics. Detail the included covariates and, in case of two-sample MR, whether the same covariate set was used for adjustment in the two samples | 2-3 | In “**Statistical analyses**”: To evaluate the causal effects of exposure on outcome, MR Analyses were performed using several methods, including inverse variance weighting (IVW), MR-Egger regression, weighted median, and Wald Ratio (for IL-1α and IL-1β ,because single SNP is available), with the IVW method or Wald Ratio method (for a single SNP) being the primary analysis, and the MR-Egger regression and the weighted median served as an auxiliary method to enhance the reliability of our finding. The IVW assumes that all SNPs are valid genetic variants and that there is no pleiotropy. The MR-Egger method has the advantage of being less susceptible to directional pleiotropy and can provide causal estimates even if all IVs are invalid, but the statistical power of MR-Egger is low. The weighted median method is less sensitive to outliers but generally less efficient. |
|  | d) | Explain how missing data were addressed | NA |  |
|  | e) | If applicable, indicate how multiple testing was addressed | 3 | In “**Statistical analyses**”: “To account for multiple testing, the Bonferroni method was used to adjust the test level as α = 0.05/ number of statistical tests. P value below 0.0125 (where P = 0.05/4) represented strong evidence of causal association, and P value below 0.05 but above 0.0125 were considered suggestive evidence of association in MR Analysis.” |
| 7 | **Assessment of assumptions** | Describe any methods or prior knowledge used to assess the assumptions or justify their validity | 2 | In “**Selection of genetic instruments**”: “Finally, in order to satisfy the second key assumption of MR (independence from confounders), we scanned each of the SNPs used as IVs for their potential secondary phenotypes using the GWAS Catalog ( https://www.ebi.ac.uk/gwas), then the significant associations of the selected SNPs with IVDD (P<5e−8) were excluded, including BMI, obesity and serum leptin levels” |
| 8 | **Sensitivity analyses and additional analyses** | Describe any sensitivity analyses or additional analyses performed (e.g. comparison of effect estimates from different approaches, independent replication, bias analytic techniques, validation of instruments, simulations) | 3 | In “**Statistical analyses**”: Experimental conditions, analysis platforms and different study subjects may contribute to heterogeneity, resulting in biased causal effect estimates. In this study, Cochran’s Q statistics were used to test heterogeneity in causal estimates. A P value < 0.05 of Cochran’s Q statistics was considered significant heterogeneity, thereby random-effects model was employed; otherwise there was no heterogeneity and a fixed effects model was used. Pleiotropy was evaluated using the MR-Egger intercept test based on the intercepts and P value. If the MR-Egger regression intercept was close to 0(< 0.1) and P > 0.05 , there was no evidence of horizontal pleiotropy in the test. Additionally, leave-one-out analysis was applied to measure the dependability of the results. Namely, each SNP was removed sequentially and then reperformed MR analysis on the remaining SNPs to identify potential influential SNPs. |
| 9 | **Software and pre-registration** |  |  |  |
|  | a) | Name statistical software and package(s), including version and settings used | 3 | In “**Statistical analyses**”: All statistical analyses were performed using the Two-Sample MR and MR-PRESSO packages in R version 4.2.1. |
|  | b) | State whether the study protocol and details were pre-registered (as well as when and where) | NA |  |
|  | **RESULTS** |  |  |  |
| 10 | **Descriptive data** |  |  |  |
|  | a) | Report the numbers of individuals at each stage of included studies and reasons for exclusion. Consider use of a flow diagram | NA |  |
|  | b) | Report summary statistics for phenotypic exposure(s), outcome(s), and other relevant variables (e.g. means, SDs, proportions) | Supplementary Table 1＆2 |  |
|  | c) | If the data sources include meta-analyses of previous studies, provide the assessments of heterogeneity across these studies | NA |  |
|  | d) | For two-sample MR:  i.  Provide justification of the similarity of the genetic variant-exposure associations between the exposure and outcome samples  ii.  Provide information on the number of individuals who overlap between the exposure and outcome studies | 3＆Supplementary Table 3 | “In our study, 46 SNPs of CRP-IVDD were incorporated as IVs for the analysis of CRP and the risk of IVDD. Detailed information on the selected IVs for CRP is listed in Supplementary Table 3.”……“ A total of 2 SNPs were included as IVs for the analysis of IL-6 and the risk of IVDD. Detailed information on the selected IVs for IL-6 is listed in Supplementary Table 3. ……One SNP was selected as instrument variant for the analysis of IL-1α and the risk of IVDD. Detailed information of the selected instrument variant was listed in Supplementary Table 3.……. In the analysis of IL-1 β and the risk of IVDD, one SNP was included, , with Supplementary Table 2 providing detailed information on the instrument variant for IL-1β .……” |
| 11 | **Main results** |  |  |  |
|  | a) | Report the associations between genetic variant and exposure, and between genetic variant and outcome, preferably on an interpretable scale | 3 | “The F-statistics values for CRP-related SNPs ranged from 29 to 1245, indicating a strong association between IVs and exposure……. The range of F-statistics for SNPs related to IL-6 is between 36 and 398, suggesting a strong correlation between the IVs and the exposure……. F-statistics value for the IL-1 α -associated SNP was 31.36, suggesting that the SNP was unlikely to be affected by weak instrument bias. ……With the F-statistic value of 34.20 for the SNP associated with IL-1 β , it suggested that there was a strong correlation between the instrument variant and the exposure.” |
|  | b) | Report MR estimates of the relationship between exposure and outcome, and the measures of uncertainty from the MR analysis, on an interpretable scale, such as odds ratio or relative risk per SD difference | 3 | “The results for the causal analysis of CRP on IVDD are presented in Figure 3. The main results of IVW found no evidence of a causal effect between IVDD and CRP (OR, 0.97; 95% CI, 0.86–1.09; P=0.583). No significant relationship result was yielded using the weight median method (OR, 1.04; 95% CI, 0.96–1.12; P=0.290). Noted that the MR Egger method showed a suggestive associations between CRP levels and risk of IVDD (OR, 1.11; 95% CI, 1.01-1.22; P=0.038).”  “No evidence of a causal association between IL-6 and IVDD was identified (OR, 1.04; 95% CI, 0.86-1.27; P=0.679).”  “MR Estimates showed no significant relationship between genetically predicted IL-1 α levels and IVDD ( OR,1.09;95%CI,1.00−1.18;P = 0.058 ).”  “The Wald Ratio result suggested suggestive associations between genetically elevated IL-1β levels and a decreased risk of IVDD(OR,0.87;95%CI,0.77−0.99;P = 0.03).” |
|  | c) | If relevant, consider translating estimates of relative risk into absolute risk for a meaningful time period | NA |  |
|  | d) | Consider plots to visualize results (e.g. forest plot, scatterplot of associations between genetic variants and outcome versus between genetic variants and exposure) | 8＆Supplementary Figs-S1–S2 | Figure 3. The MR estimate results of CRP, IL-1α , IL-1β , and IL-6 association with IVDD. IVW : inverse variance weighted;CI: confidence interval; OR: odds ratio; nsnp: number of single nucleotide polymorphism. |
| 12 | **Assessment of assumptions** |  |  |  |
|  | a) | Report the assessment of the validity of the assumptions | 3＆7 | “P value > 0.05 was obtained for MR-Egger intercept test, suggesting the absence of horizontal pleiotropy(intercept = 4.94E-03, P = 0.122, Table 1).” |
|  | b) | Report any additional statistics (e.g., assessments of heterogeneity across genetic variants, such as *I2*, Q statistic or E-value) | 3＆7 | In “**Causal effects of CRP on IVDD**”: “Cochrane’s Q results suggested some significant differences in the causal estimates between CRP levels and IVDD risk. (Cochrane’s Q in MR-Egger =74.62, P=2.67E-03; Cochrane’s Q in IVW =78.83, P=1.34E-03, Table 1). In this scenario, the IVW random effects method was employed, because it addresses the heterogeneity issue of variant-specific causal estimates, compared to the fixed effects model”. In “**Causal effects of IL-6 on the risk of IVDD**”: “The heterogeneity test revealed no evidence of heterogeneity (Cochrane’s Q in IVW=1.77, P=1.82E-01).”. |
| 13 | **Sensitivity analyses and additional analyses** |  |  |  |
|  | a) | Report any sensitivity analyses to assess the robustness of the main results to violations of the assumptions | 3＆9 | “As is shown in Figure 4A, the leave-one-out  analysis revealed that causal estimates for CRP and IVDD were not influenced by a single SNP, indicating that the MR results were robust.” |
|  | b) | Report results from other sensitivity analyses or additional analyses | Supplementary Figs-S1–S2 |  |
|  | c) | Report any assessment of direction of causal relationship (e.g., bidirectional MR) | NA |  |
|  | d) | When relevant, report and compare with estimates from non-MR analyses | NA |  |
|  | e) | Consider additional plots to visualize results (e.g., leave-one-out analyses) | 3＆9 | “As is shown in Figure 4A, the leave-one-out  analysis revealed that causal estimates for CRP and IVDD were not influenced by a single SNP, indicating that the MR results were robust.” |
|  | **DISCUSSION** |  |  |  |
| 14 | **Key results** | Summarize key results with reference to study objectives | 4 | “In this study, TSMR analysis was employed to study a potential causal relationship between CRP, IL-6, IL-1α and IL-1β on Intervertebral disc degeneration(IVDD). No evidence was discovered to support a causal relationship between IL-1α , IL-6 and CRP in the occurrence of IVDD. The present study discovered a correlation between genetically increased IL-1β expression and a lower risk of IVDD, but this finding is based on just one SNP and lacks heterogeneity and horizontal pleiotropy analysis.” |
| 15 | **Limitations** | Discuss limitations of the study, taking into account the validity of the IV assumptions, other sources of potential bias, and imprecision. Discuss both direction and magnitude of any potential bias and any efforts to address them |  | “However, our study also had some limitations. Firstly, we selected individuals of European ancestry as our study subjects to reduce population stratification bias. Consequently, the generalization of our findings to other racial groups may be subject to limitations. Second, we merely investigated the causal relationship between CRP, IL-1, IL-6 expression levels and IVDD, and did not analyze other biomarkers and transcription factors of chronic inflammation, which may also be critical for the development of IVDD. Thirdly, we only used genetic tools to assess the causal relationship between inflammatory biomarkers and IVDD risk, and further mechanistic studies are needed to elucidate our findings.” |
| 16 | **Interpretation** |  |  |  |
|  | a) | Meaning: Give a cautious overall interpretation of results in the context of their limitations and in comparison with other studies | 4 | “Although a large number of literatures have proven the correlation between CRP, IL-1α , and IL-6 with IVDD , we found that CRP, IL-1α , and IL-6 have no significant causal relationship with IVDD. Our speculation is that these three inflammatory  factors do not directly cause IVDD but may be reactive elements to other chronic inflammatory risk factors, which requires further indepth research. A MR study 45 found that increased IL-6 may be associated with a reduced risk of LBP. Our research findings differ from this MR study, possibly because IVDD is only a part of the spectrum of LBP diseases, with varying levels of IL-6 in different diseases within the LBP spectrum. Weber et al found that compared to patients with LBP due to disc herniation, patients with LBP due to spinal stenosis and IVDD had significantly elevated IL-6 levels.” |
|  | b) | Mechanism: Discuss underlying biological mechanisms that could drive a potential causal relationship between the investigated exposure and the outcome, and whether the gene-environment equivalence assumption is reasonable. Use causal language carefully, clarifying that IV estimates may provide causal effects only under certain assumptions | 4 | “There has been a large amount of research on the mechanisms driving IVDD by inflammatory factors such as CRP, IL-1(IL-1α and IL-1β), and IL-6, but they have not been fully revealed. These inflammatory factors can induce each other, leading to a step-by-step expansion of the inflammatory response. For example, CRP can increase IL-6 and IL-8 expression in IVD AF cells, IL-1β stimulation significantly enhances IL-6 and IL-8 expression in human IVD cells . In vivo experiments, degenerative changes including NP ECM degradation and AF rupture can be observed after IVD injection of inflammatory factors. In normal IVD cells, inflammatory factors and their inhibitors are in a dynamic equilibrium, but in IVDD cells, inflammatory factors such as IL-1β are significantly increased, the expression of ECM degradation metabolites such as matrix metalloproteinases (MMP) is increased, and ECM synthesis metabolism does not significantly increase, resulting in ECM degradation and IVD structure destruction. There was research proving that inflammatory factors can promote IVD cell aging and apoptosis. Inflammatory factors can promote an increase in blood vessels on the IVD surface, as well as nerve growth into the IVD, increasing the risk of back pain. These mechanisms all make the IVD gradually unstable, leading to lumbar disc degeneration, protrusion, and back pain.”  “Our research shows that elevated levels of IL-1β may reduce the risk of IVDD, which is contrary to the conclusions of many observational studies. However, since only one SNP is supported, heterogeneity and gene pleiotropy tests cannot be performed, so we are more cautious in interpreting this result. Research found that the IL-1bT3954 allele is a common IL-1β gene polymorphism, which has been proven to be associated with elevated levels of IL-1β 46 and has the potential to reduce the risk of disc degeneration. However, the specific underlying mechanism needs to be further studied in future experiments.” |
|  | c) | Clinical relevance: Discuss whether the results have clinical or public policy relevance, and to what extent they inform effect sizes of possible interventions | 4 | “……Clinical observational studies found that plasma CRP levels in patients with lumbar IVDD were significantly higher than those patients with lumbar pain but normal MRI examination. Similar findings were also noted in cervical vertebrae……. Inflammatory factors can promote an increase in blood vessels on the IVD surface , as well as nerve growth into the IVD, increasing the risk of back pain 44 . These mechanisms all make the IVD gradually unstable, leading to lumbar disc degeneration, protrusion, and back pain…….” |
| 17 | **Generalizability** | Discuss the generalizability of the study results (a) to other populations, (b) across other exposure periods/timings, and (c) across other levels of exposure | 4 | “…… Firstly, we selected individuals of European ancestry as our study subjects to reduce population stratification bias. Consequently, the generalization of our findings to other racial groups may be subject to limitations. Second, we merely investigated the causal relationship between CRP, IL-1, IL-6 expression levels and IVDD, and did not analyze other biomarkers and transcription factors of chronic inflammation, which may also be critical for the development of IVDD.” |
|  | **OTHER INFORMATION** |  |  |  |
| 18 | **Funding** | Describe sources of funding and the role of funders in the present study and, if applicable, sources of funding for the databases and original study or studies on which the present study is based | NA |  |
| 19 | **Data and data sharing** | Provide the data used to perform all analyses or report where and how the data can be accessed, and reference these sources in the article. Provide the statistical code needed to reproduce the results in the article, or report whether the code is publicly accessible and if so, where | 5＆Supplementary Table 1、2 | In “**Data availability**”：“All data generated or analysed during this study are included in this published article and its supplementary information files. Further inquiries can be directed to the corresponding authors”. And in “Data sources”: “The details of these GWAS data sources are listed in Supplementary Table 1.”and “Other detailed information of the outcome is presented in Supplementary Table 2.”. |
| 20 | **Conflicts of Interest** | All authors should declare all potential conflicts of interest | 7 | In “**Additional information**”：“Competing interests The authors declare that the research was conducted in the absence of any commercial or financial relationships that could be construed as a potential conflict of interest.” |

This checklist is copyrighted by the Equator Network under the Creative Commons Attribution 3.0 Unported (CC BY 3.0) license.

1. Skrivankova VW, Richmond RC, Woolf BAR, Yarmolinsky J, Davies NM, Swanson SA, et al. Strengthening the Reporting of Observational Studies in Epidemiology using Mendelian Randomization (STROBE-MR) Statement. JAMA. 2021;under review.

2. Skrivankova VW, Richmond RC, Woolf BAR, Davies NM, Swanson SA, VanderWeele TJ, et al. Strengthening the Reporting of Observational Studies in Epidemiology using Mendelian Randomisation (STROBE-MR): Explanation and Elaboration. BMJ. 2021;375:n2233.
